# Supplementary material
Source: PubMed Central journal article supplement (PMC7909718)
Supplement: NIHMS1672156-supplement-Suppl_Materials.pdf [file NIHMS1672156-supplement-Suppl_Materials.pdf]

# Supplementary Figure 1.

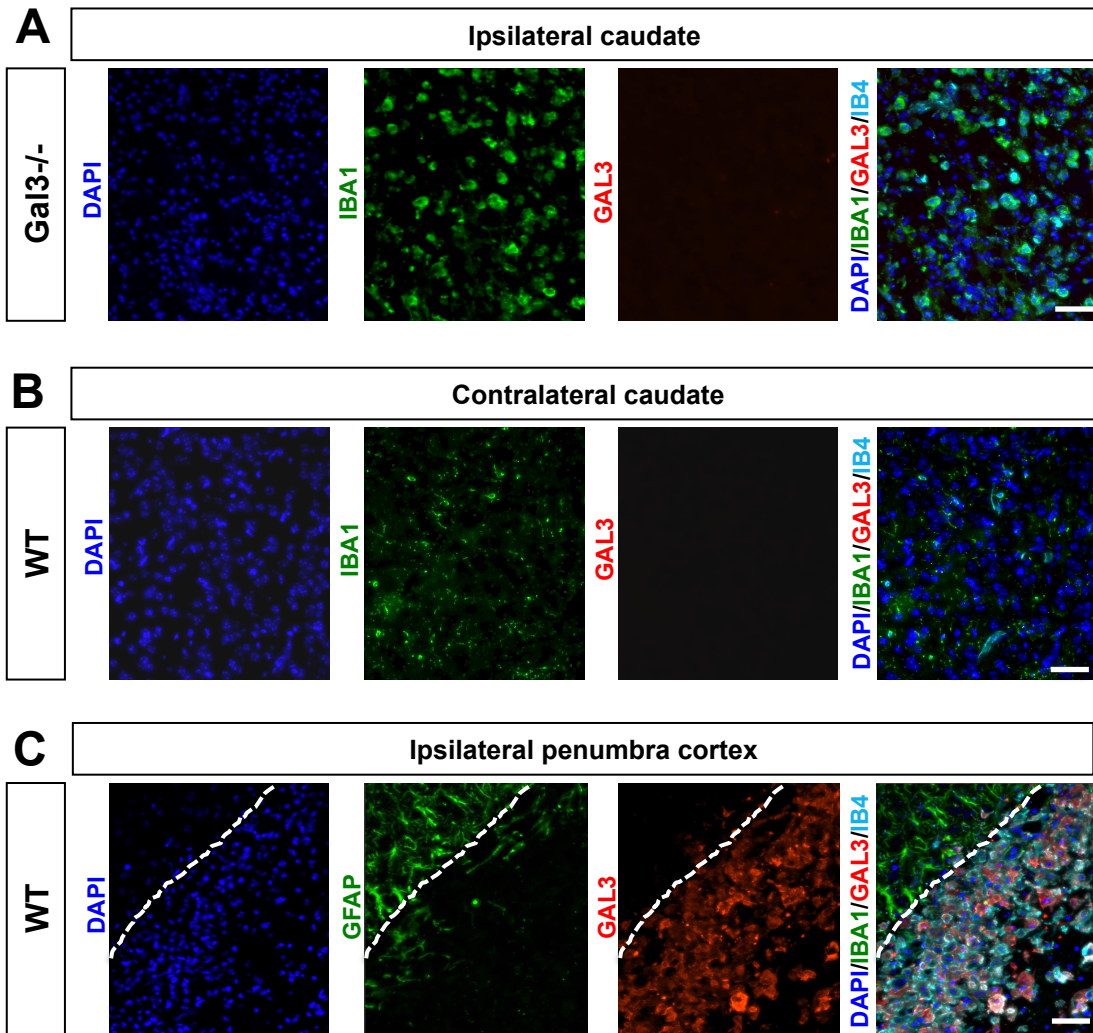

# Supplementary Figure 2.

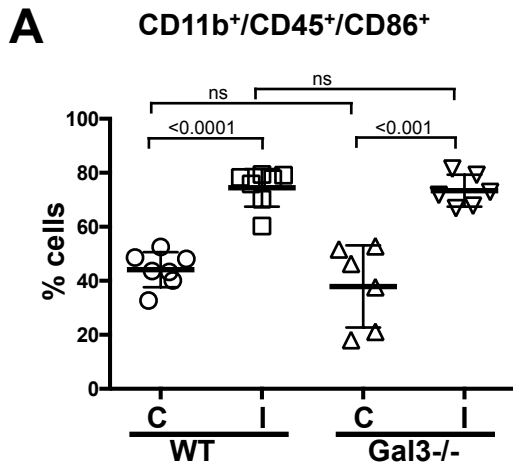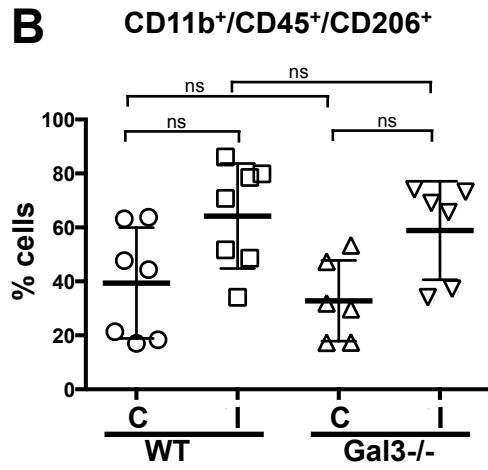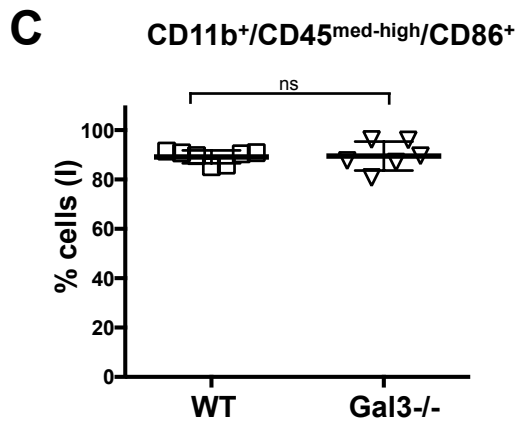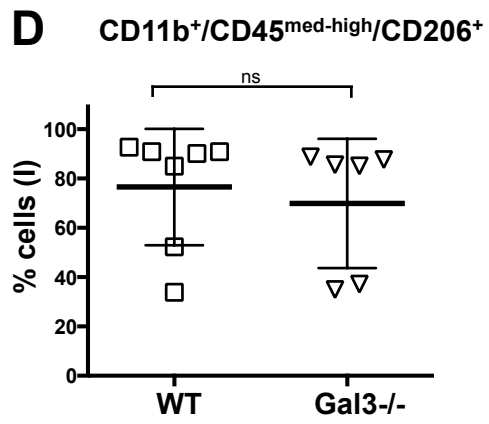

# Supplementary Figure 3.

**A**

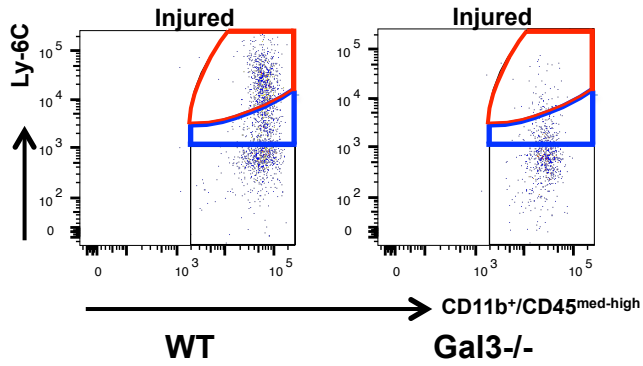

**B**

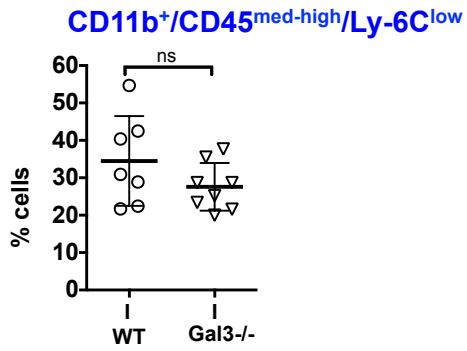

**C**

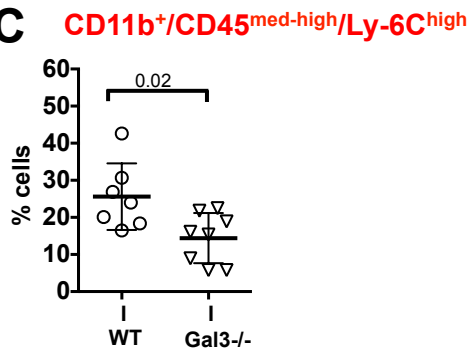

## Supplementary Figure legends

### **Suppl. Figure 1. Gal3 is absent in injured Gal3<sup>-/-</sup> mice but is upregulated in a small subset of astrocytes in the penumbra of WT mice, 72h post-MCAO.**

**A.** Gal3 is not observed in the injured caudate of Gal3<sup>-/-</sup> mice. Dying cells are indicated by punctate DAPI<sup>+</sup> nuclei. Iba1<sup>+</sup> and IB4<sup>+</sup> amoeboid microglia/macrophages are abundant in injured regions. **B.** No Gal3<sup>+</sup> cells are seen in the contralateral caudate region of WT mice. Note round-shaped morphology of DAPI<sup>+</sup> nuclei. **C.** Gal3 is abundantly expressed in the cortical penumbra region of WT mice. Note many Gal3<sup>+</sup>/IB4<sup>+</sup> cells but only few Gal3<sup>+</sup>/GFAP<sup>+</sup> cells. Dashed line represents the border of the peri-infarct region. (scale bar: 40 μm).

### **Suppl. Figure 2. Lack of Gal3 does not alter expression of CD86 or CD206 in CD11b<sup>+</sup>/CD45<sup>+</sup> or CD11b<sup>+</sup>/CD45<sup>med-high</sup> cells.**

**A-B.** Percent of CD11b<sup>+</sup>/CD45<sup>+</sup> cells (including CD45-low, -medium, and -high) that express CD86<sup>+</sup> (A) and CD206<sup>+</sup> (B) in injured (I) and in matching contralateral (C) region of WT and Gal3<sup>-/-</sup> mice. **C-D.** Percent of CD11b<sup>+</sup>/CD45<sup>med-high</sup> cells that express CD86<sup>+</sup> (D) and CD206<sup>+</sup> (E) in injured region of both WT and Gal3<sup>-/-</sup>. Similar data analysis was not performed in the contralateral regions because there were essentially no CD11b<sup>+</sup>/CD45<sup>med-high</sup> cells. Dots in A-E represent data from individual animals (WT n = 7, Gal3<sup>-/-</sup> n = 6). Mean ± SD. Significance levels as indicated by P values on individual panels. ns: non-significant (ANOVA with Bonferroni post hoc test). (C) – contralateral, (I) – injured.

### **Suppl. Figure 3. Gal3 affects infiltration of Ly-6C cells.**

**A.** Gates used to identify CD11b<sup>+</sup>/CD45<sup>med-high</sup>/Ly-6C<sup>high</sup> cells (activated microglial and monocyte-derived macrophages, red). **B-C.** Percent of CD11b<sup>+</sup>/CD45<sup>med-high</sup>/Ly-6C<sup>low</sup> and CD11b<sup>+</sup>/CD45<sup>med-high</sup>/Ly-6C<sup>high</sup> cells in injured regions of WT and Gal3<sup>-/-</sup> 72h post-MCAO; percent of positive cells was not analyzed in matching contralateral regions because of too few CD11b<sup>+</sup>/CD45<sup>med-high</sup> positive cells in this region. Dots in B-C represent individual animals (n = 7 for WT and n = 8 for Gal3<sup>-/-</sup>), Mean ± SD, significance levels indicated on individual panels, ns: non-significant (ANOVA with Bonferroni post hoc test).
